# Supplementary material for: Triple-Knockout, Synuclein-Free Mice Display Compromised Lipid Pattern
Source: MDPI journal article supplement (doi:10.3390/molecules26113078), 2021-05-21
Supplement: s1 [file s1]

## Article

# Triple-Knockout, Synuclein-Free Mice Display Compromised Lipid Pattern

Irina A. Guschina <sup>1,\*</sup>, Natalia Ninkina <sup>1,2</sup>, Andrei Roman <sup>1,2</sup>, Mikhail V. Pokrovskiy <sup>3</sup> and Vladimir L. Buchman <sup>1,2</sup>

**Table S1** Fatty acid composition of total lipids (% of total fatty acids) in plasma and liver from triple-synuclein null mutant (TKO) and wild-type (WT) mice

| Fatty acid | PLASMA     |             | LIVER      |             |
|------------|------------|-------------|------------|-------------|
|            | WT         | TKO         | WT         | TKO         |
| C16:0      | 17.4 ± 1.0 | 24.1 ± 2.7* | 19.2 ± 0.6 | 22.3 ± 2.2* |
| C16:1n9    | 0.5 ± 0.1  | 0.7 ± 0.0 * | 0.9 ± 0.2  | 1.0 ± 0.1   |
| C16:1n7    | 1.9 ± 0.4  | 2.2 ± 1.2   | 1.6 ± 0.5  | 2.1 ± 0.8   |
| C18:0      | 12.0 ± 1.5 | 11.3 ± 1.7  | 8.5 ± 0.9  | 9.3 ± 1.5   |
| C18:1n9    | 24.0 ± 1.8 | 24.3 ± 2.9  | 33.1 ± 4.0 | 24.1 ± 2.2* |
| C18:1n7    | 1.3 ± 0.2  | 1.7 ± 0.2*  | 1.8 ± 0.4  | 1.8 ± 0.5   |
| C18:2n6    | 21.8 ± 1.8 | 21.4 ± 1.6  | 16.7 ± 2.0 | 16.4 ± 0.7  |
| C18:3n3    | 0.8 ± 0.5  | 1.1 ± 0.1   | 0.5 ± 0.1  | 0.5 ± 0.1   |
| C20:3n6    | 1.1 ± 0.1  | 0.6 ± 0.1*  | 1.2 ± 0.2  | 1.8 ± 0.1*  |
| C20:4n6    | 11.7 ± 2.0 | 7.1 ± 0.8*  | 8.3 ± 1.2  | 10.2 ± 1.6  |
| C20:5n3    | 0.7 ± 0.1  | 0.9 ± 0.2   | tr.        | tr.         |
| C22:6n3    | 4.8 ± 0.8  | 2.3 ± 0.1*  | 5.7 ± 1.1  | 6.8 ± 0.7   |

Data as means ± SD ( $n = 6$ ). Fatty acids are indicated with the number before colon showing the number of carbon atoms, the figure afterwards denoting the number of double bonds. The position of the first double bond is shown after “n”. Only the major fatty acids ( $\geq 0.5\%$ ) are listed; tr., trace  $< 0.5\%$ . The asterisk (\*) indicates a significant effect of triple-synuclein deficiency when compared with WT ( $p < 0.05$ ).

**Table S2** Fatty acid composition of triacylglycerols (% of TAG fatty acids) in plasma and liver from triple-synuclein null mutant (TKO) and wild-type (WT) mice

| Fatty acid | PLASMA     |            | LIVER      |             |
|------------|------------|------------|------------|-------------|
|            | WT         | TKO        | WT         | TKO         |
| C16:0      | 19.6 ± 1.4 | 18.9 ± 4.1 | 17.7 ± 1.4 | 20.3 ± 2.6  |
| C16:1n9    | 0.9 ± 0.1  | 1.1 ± 0.5  | 1.5 ± 0.3  | 2.3 ± 0.2*  |
| C16:1n7    | 3.7 ± 1.1  | 4.3 ± 1.9  | 1.9 ± 1.0  | 3.7 ± 1.3*  |
| C18:0      | 6.6 ± 1.6  | 3.9 ± 0.9* | 2.2 ± 0.3  | 1.8 ± 0.3   |
| C18:1n9    | 45.4 ± 1.0 | 44.5 ± 6.1 | 52.5 ± 3.5 | 47.3 ± 2.2* |
| C18:2n6    | 18.1 ± 1.2 | 20.3 ± 1.6 | 18.9 ± 2.8 | 17.9 ± 1.8  |
| C18:3n3    | 1.5 ± 0.3  | 1.4 ± 0.3  | 0.6 ± 0.1  | 0.8 ± 0.2   |
| C20:4n6    | 1.0 ± 0.3  | 1.2 ± 0.2  | 1.0 ± 0.3  | 1.1 ± 0.3   |
| C22:6n3    | 1.5 ± 0.4  | 1.8 ± 0.3  | 1.5 ± 0.7  | 1.6 ± 0.4   |

Data as means ± SD ( $n = 6$ ). See legend to Table 1S for other details. The asterisk (\*) indicates a significant effect of triple-synuclein deficiency when compared with WT ( $p < 0.05$ ).

**Table S3** Fatty acid composition of steryl esters (% of SE fatty acids) in plasma and liver from triple-synuclein null mutant (TKO) and wild-type (WT) mice

| Fatty acid | PLASMA     |             | LIVER      |             |
|------------|------------|-------------|------------|-------------|
|            | WT         | TKO         | WT         | TKO         |
| C16:0      | 5.6 ± 0.9  | 4.5 ± 0.9   | 11.8 ± 1.3 | 18.6 ± 2.4* |
| C16:1n9    | 1.1 ± 0.4  | 1.0 ± 0.1   | 1.3 ± 0.2  | 2.8 ± 0.6*  |
| C16:1n7    | 1.8 ± 0.3  | 1.9 ± 0.3   | 5.0 ± 1.2  | 6.2 ± 2.2   |
| C18:0      | 3.7 ± 1.2  | 1.9 ± 0.8*  | 4.7 ± 1.1  | 9.8 ± 3.3*  |
| C18:1n9    | 14.9 ± 3.9 | 11.4 ± 2.6  | 61.1 ± 3.4 | 43.2 ± 8.4* |
| C18:2n6    | 34.0 ± 2.1 | 42.4 ± 2.3* | 12.7 ± 2.0 | 13.7 ± 1.3  |
| C18:3n3    | 1.9 ± 0.6  | 2.2 ± 0.2   | 1.6 ± 0.2  | 3.8 ± 1.2*  |
| C20:3n6    | 0.8 ± 0.2  | 1.1 ± 0.2   | tr.        | tr.         |
| C20:4n6    | 30.7 ± 4.3 | 27.1 ± 1.6  | 1.9 ± 0.6  | 1.9 ± 0.8   |
| C20:5n3    | 1.5 ± 0.4  | 1.7 ± 0.5   | tr.        | tr.         |
| C22:6n3    | 3.5 ± 0.5  | 3.7 ± 0.2   | tr.        | tr.         |

Data as means ± SD ( $n = 6$ ). See legend to Table 1S for other details. The asterisk (\*) indicates a significant effect of triple-synuclein deficiency when compared with WT ( $p < 0.05$ ).

**Table S4** Fatty acid composition of total lipids (% of total fatty acids) in midbrain and cortex from triple-synuclein null mutant (TKO) and wild-type (WT) mice

| Fatty acid | MIDBRAIN   |            | CORTEX     |            |
|------------|------------|------------|------------|------------|
|            | WT         | TKO        | WT         | TKO        |
| C16:0      | 16.5 ± 0.2 | 17.8 ± 1.2 | 20.9 ± 0.2 | 21.3 ± 0.6 |
| C16:1n7    | 0.5 ± 0.1  | 0.5 ± 0.1  | 0.5 ± 0.0  | 0.6 ± 0.1  |
| C18:0      | 20.6 ± 0.6 | 20.9 ± 0.4 | 21.6 ± 0.2 | 21.2 ± 0.2 |
| C18:1n9    | 20.1 ± 0.6 | 19.6 ± 0.9 | 15.5 ± 0.4 | 15.5 ± 0.6 |
| C18:1n7    | 4.9 ± 0.4  | 4.7 ± 0.3  | 3.7 ± 0.2  | 3.7 ± 0.2  |
| C20:1n9    | 3.2 ± 0.2  | 2.5 ± 0.3  | 1.2 ± 0.1  | 1.2 ± 0.2  |
| C20:4n6    | 8.3 ± 0.4  | 9.3 ± 0.4* | 10.6 ± 0.2 | 10.7 ± 0.3 |
| C22:4n6    | 3.4 ± 0.3  | 3.3 ± 0.2  | 2.6 ± 0.3  | 2.5 ± 0.2  |
| C22:6n3    | 12.9 ± 0.5 | 13.6 ± 0.5 | 17.9 ± 0.3 | 17.6 ± 0.5 |
| C24:0      | 0.9 ± 0.1  | 0.6 ± 0.1* | tr.        | tr.        |
| C24:1n9    | 2.7 ± 0.3  | 1.8 ± 0.2* | 1.1 ± 0.1  | 1.0 ± 0.3  |
| C26:1n9    | 2.8 ± 0.2  | 1.8 ± 0.1* | 1.3 ± 0.2  | 1.3 ± 0.5  |

Data as means ± SD ( $n = 6$ ). See legend to Table 1S for other details. The asterisk (\*) indicates a significant effect of triple-synuclein deficiency when compared with WT ( $p < 0.05$ ).
